# Supplementary material for: Plasma Proteomic Signature Predicts Myeloid Neoplasm Risk
Source: PubMed Central journal article supplement — Clin Cancer Res. 2024 Mar 6;30(15):3220–8. doi: 10.1158/1078-0432.CCR-23-3468 (PMC11292192; doi:10.1158/1078-0432.ccr-23-3468), 2024-03-06
Supplement: ccr-23-3468_supplementary_figure_s2_suppfs2.pdf [file ccr-23-3468_supplementary_figure_s2_suppfs2.pdf]

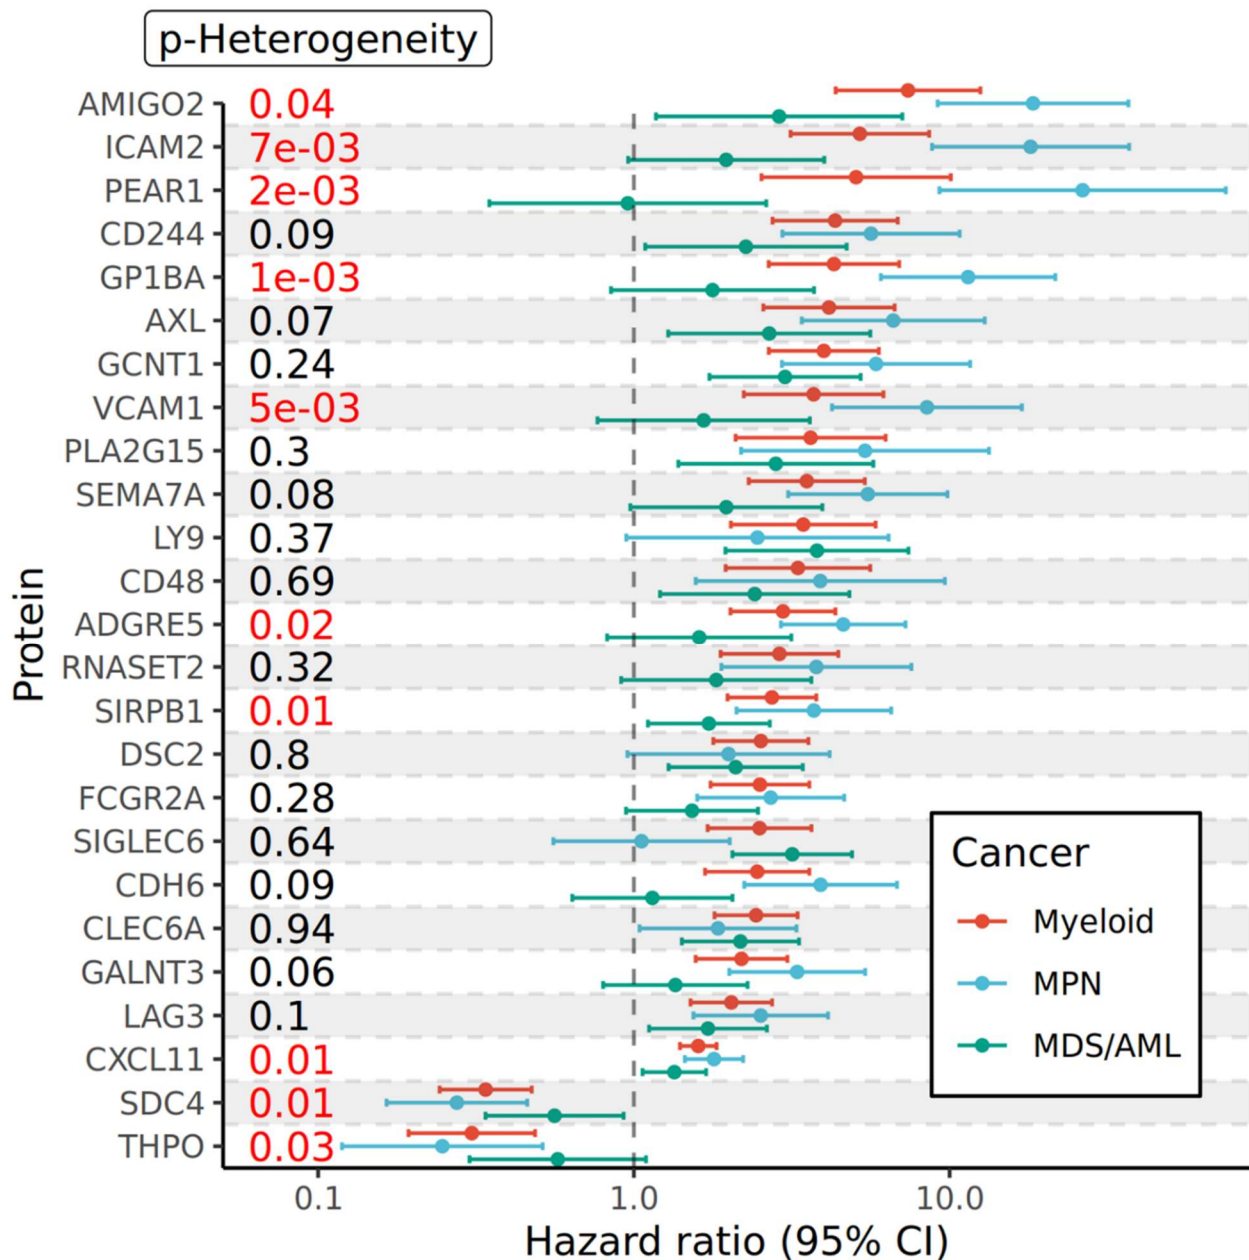

**Supplemental Figure 2. Association between MN and plasma protein levels stratified by MN subtype (MPN vs. MDS/AML).** Cox regression adjusted for age, sex, smoking status, year of sample collection, blood count measurements, and the top 10 principal components of genetic ancestry was used to test for an association between plasma protein expression and MN subtype. Shown are the hazard ratios (HR) and their confidence intervals (95%) for the top 25 proteins associated with MN risk. For each protein, p-values for heterogeneity were used to test for differences in plasma protein levels comparing MPN to MDS/AML, statistically significant results ( $p < 0.05$ ) are colored in red.
