# Supplementary material for: Plasma Proteomic Signature Predicts Myeloid Neoplasm Risk
Source: PubMed Central journal article supplement — Clin Cancer Res. 2024 Mar 6;30(15):3220–8. doi: 10.1158/1078-0432.CCR-23-3468 (PMC11292192; doi:10.1158/1078-0432.ccr-23-3468), 2024-03-06
Supplement: ccr-23-3468_supplementary_figure_s3_suppfs3.pdf [file ccr-23-3468_supplementary_figure_s3_suppfs3.pdf]

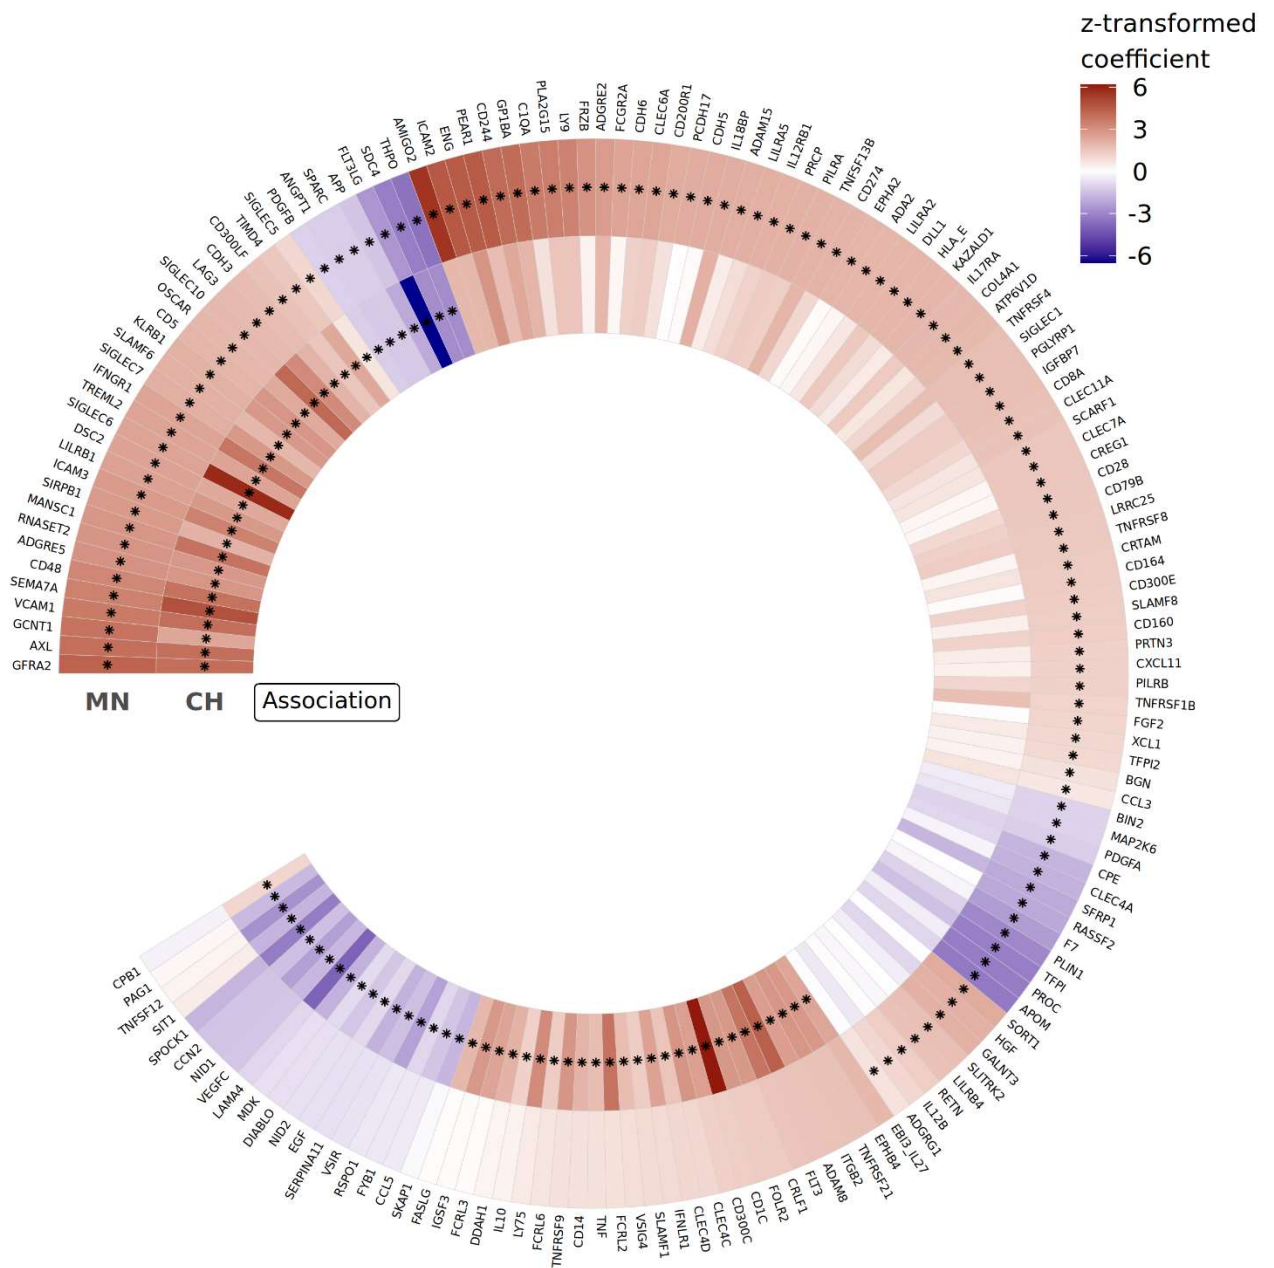

**Supplemental Figure 3. Association between MN, CH and plasma protein levels.** Multivariable cox regression adjusted for age, sex, smoking status, year of sample collection, blood count measurements, and the top 10 principal components of genetic ancestry was used to test for an association between plasma protein expression and incident MN. Multivariable logistic regression adjusted for the same covariates was used to test for an association with the presence of CH at the time of UK Biobank entry. All proteins significantly associated with MN and/or CH are shown in the circular heatmap. Each box represents a protein-MN or -CH association and is colored according to the z-transformed beta-coefficient (reflects protein expression levels); statistically significant associations (FDR-corrected  $p < 0.05$ ) are labeled with an asterisk (\*).
