# Supplementary material for: Plasma Proteomic Signature Predicts Myeloid Neoplasm Risk
Source: PubMed Central journal article supplement — Clin Cancer Res. 2024 Mar 6;30(15):3220–8. doi: 10.1158/1078-0432.CCR-23-3468 (PMC11292192; doi:10.1158/1078-0432.ccr-23-3468), 2024-03-06
Supplement: ccr-23-3468_supplementary_figure_s4_suppfs4.pdf [file ccr-23-3468_supplementary_figure_s4_suppfs4.pdf]

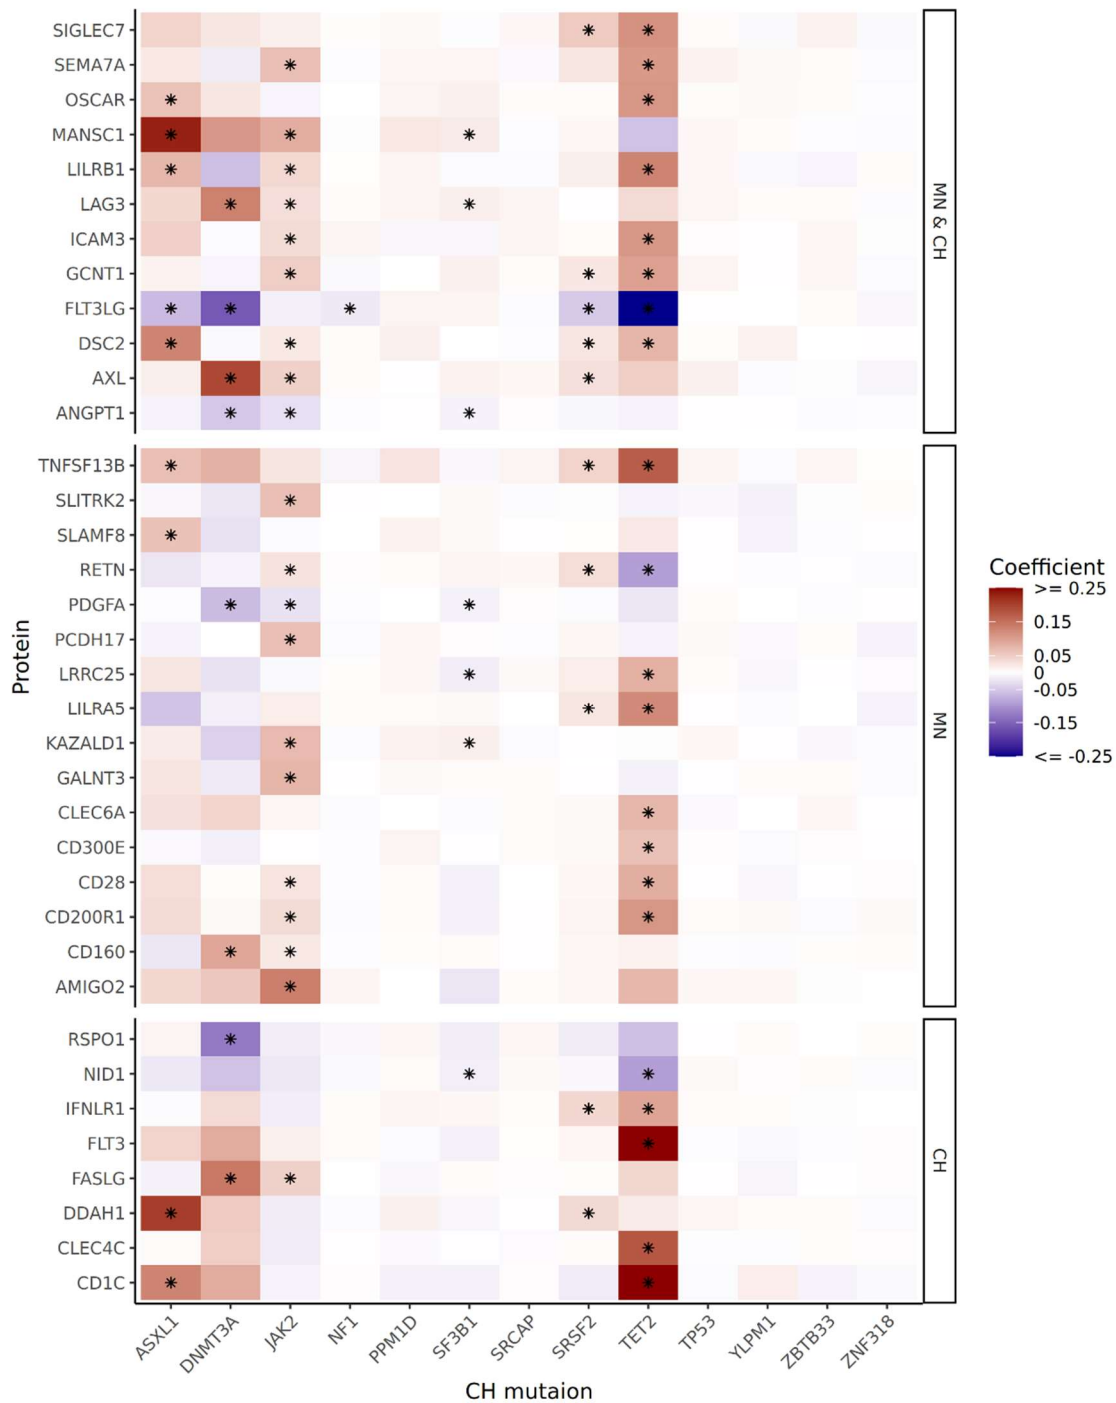

**Supplemental Figure 4. Association between plasma proteins and common CH genes.** Linear regression was used to test for an association between CH driven by mutations in specific genes (shown on the x axis) and plasma protein levels shown on the y axis. All analyses were adjusted for age, sex, and blood count measurements. Each box represents a pair-wise CH-protein test colored according to the beta-coefficient; statistically significant associations (FDR-corrected  $p < 0.05$ ) are labeled with an asterisk (\*). Proteins are grouped by statistical significance for MN & CH, MN only, or CH only on the right side of the heatmap. This analysis was limited to CH mutations present in  $\geq 20$  individuals. Shown are proteins which had a stronger association with a specific CH gene than with other CH genes, defined as having coefficients that deviated more than 2.5 standard deviations from the mean.
