# Supplementary material for: Plasma Proteomic Signature Predicts Myeloid Neoplasm Risk
Source: PubMed Central journal article supplement — Clin Cancer Res. 2024 Mar 6;30(15):3220–8. doi: 10.1158/1078-0432.CCR-23-3468 (PMC11292192; doi:10.1158/1078-0432.ccr-23-3468), 2024-03-06
Supplement: ccr-23-3468_supplementary_figure_s5_suppfs5.pdf [file ccr-23-3468_supplementary_figure_s5_suppfs5.pdf]

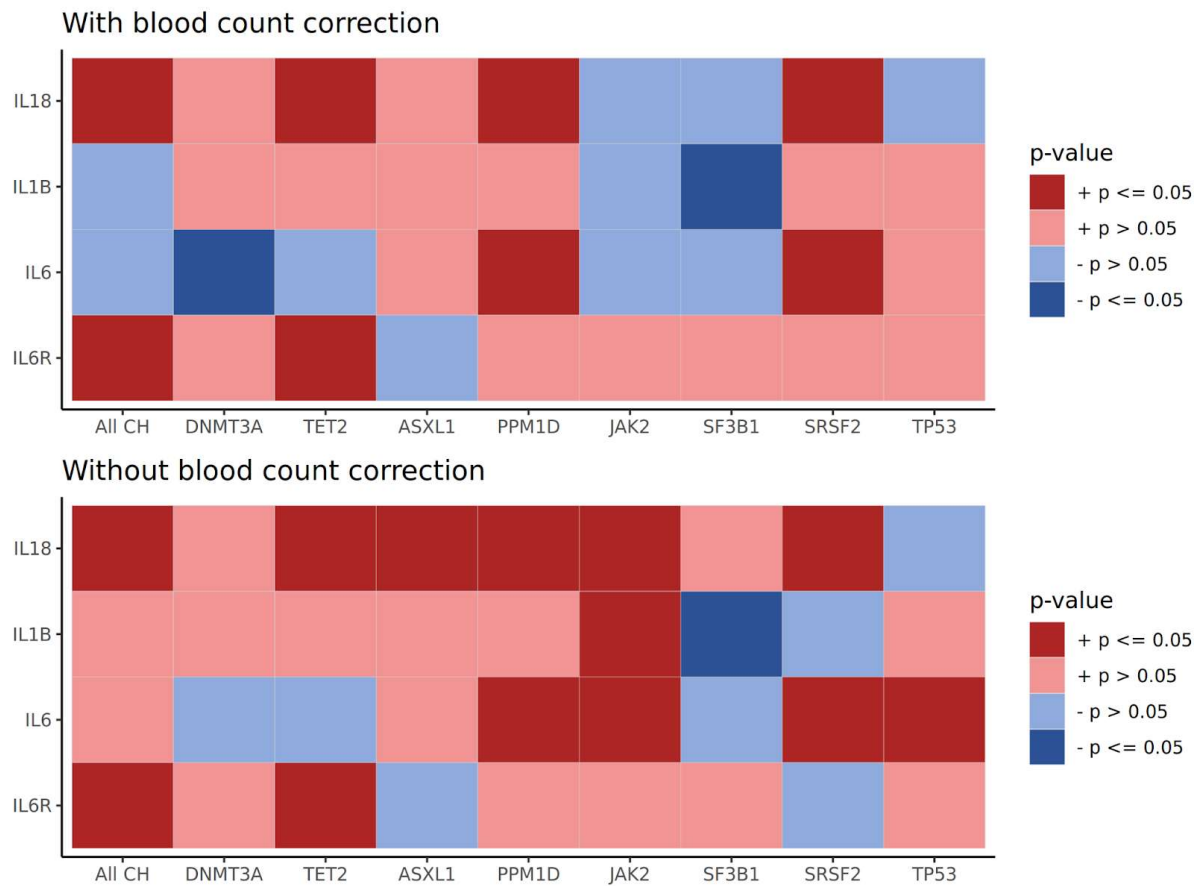

**Supplemental Figure 5: Association between plasma proteins and CH genes with or without blood count correction.** Logistic regression was used to test for an association between CH driven by mutations in all or specific CH genes (shown on the x axis) and plasma protein levels shown on the y axis. All analyses were adjusted for age, sex, and blood count measurements (when referenced). For the analysis with all CH genes, additional clinical features, including smoking status, year of sample collection, and the top 10 principal components of genetic ancestry, were added. Each box represents a pair-wise CH-protein test colored according to the p-value.
