# Supplementary material for: Plasma Proteomic Signature Predicts Myeloid Neoplasm Risk
Source: PubMed Central journal article supplement — Clin Cancer Res. 2024 Mar 6;30(15):3220–8. doi: 10.1158/1078-0432.CCR-23-3468 (PMC11292192; doi:10.1158/1078-0432.ccr-23-3468), 2024-03-06
Supplement: ccr-23-3468_supplementary_figure_s6_suppfs6.pdf [file ccr-23-3468_supplementary_figure_s6_suppfs6.pdf]

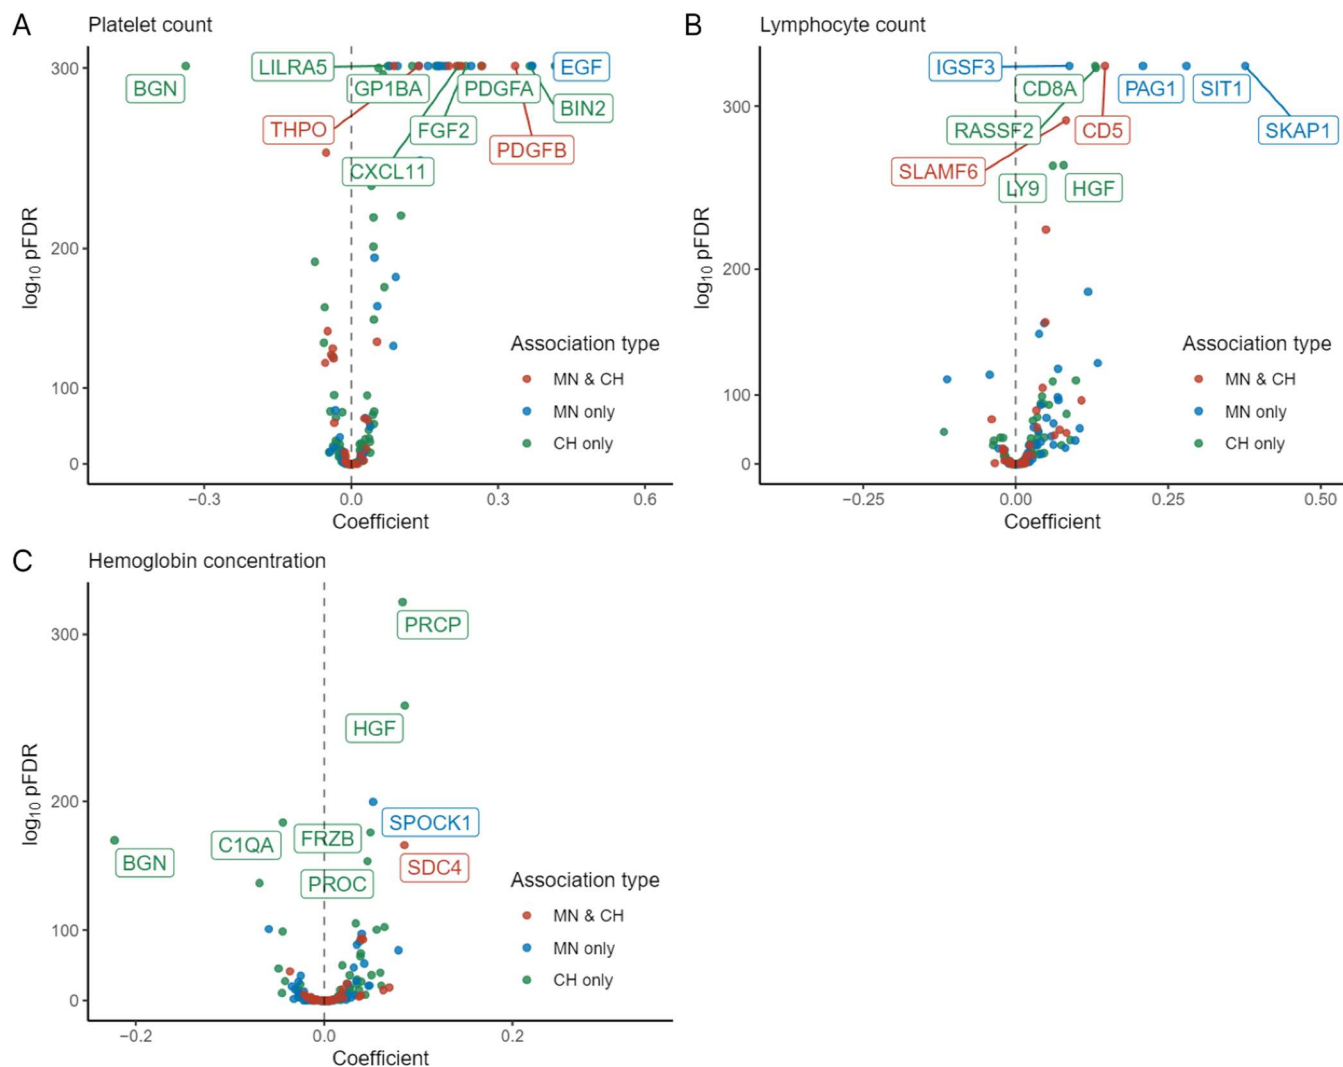

**Supplemental Figure 6. Association between plasma protein levels and blood count parameters.** Linear regression was used to test for an association between plasma protein levels and (A) platelet counts, (B) lymphocyte counts, and (C) hemoglobin concentration. All analyses were adjusted for age, sex, race, smoking status, year of sample collection, and CH genes mutated in  $\geq 20$  individuals. The x-axis displays the beta coefficients from the regressions. Each circle represents one protein colored by statistical significance (FDR-corrected p-value  $< 0.05$ ) for MN (blue), CH (green), MN & CH (red). The top 10 most significant pFDR in each plot are labeled by protein name.
