# Supplementary material for: Plasma Proteomic Signature Predicts Myeloid Neoplasm Risk
Source: PubMed Central journal article supplement — Clin Cancer Res. 2024 Mar 6;30(15):3220–8. doi: 10.1158/1078-0432.CCR-23-3468 (PMC11292192; doi:10.1158/1078-0432.ccr-23-3468), 2024-03-06
Supplement: ccr-23-3468_supplementary_figure_s7_suppfs7.pdf [file ccr-23-3468_supplementary_figure_s7_suppfs7.pdf]

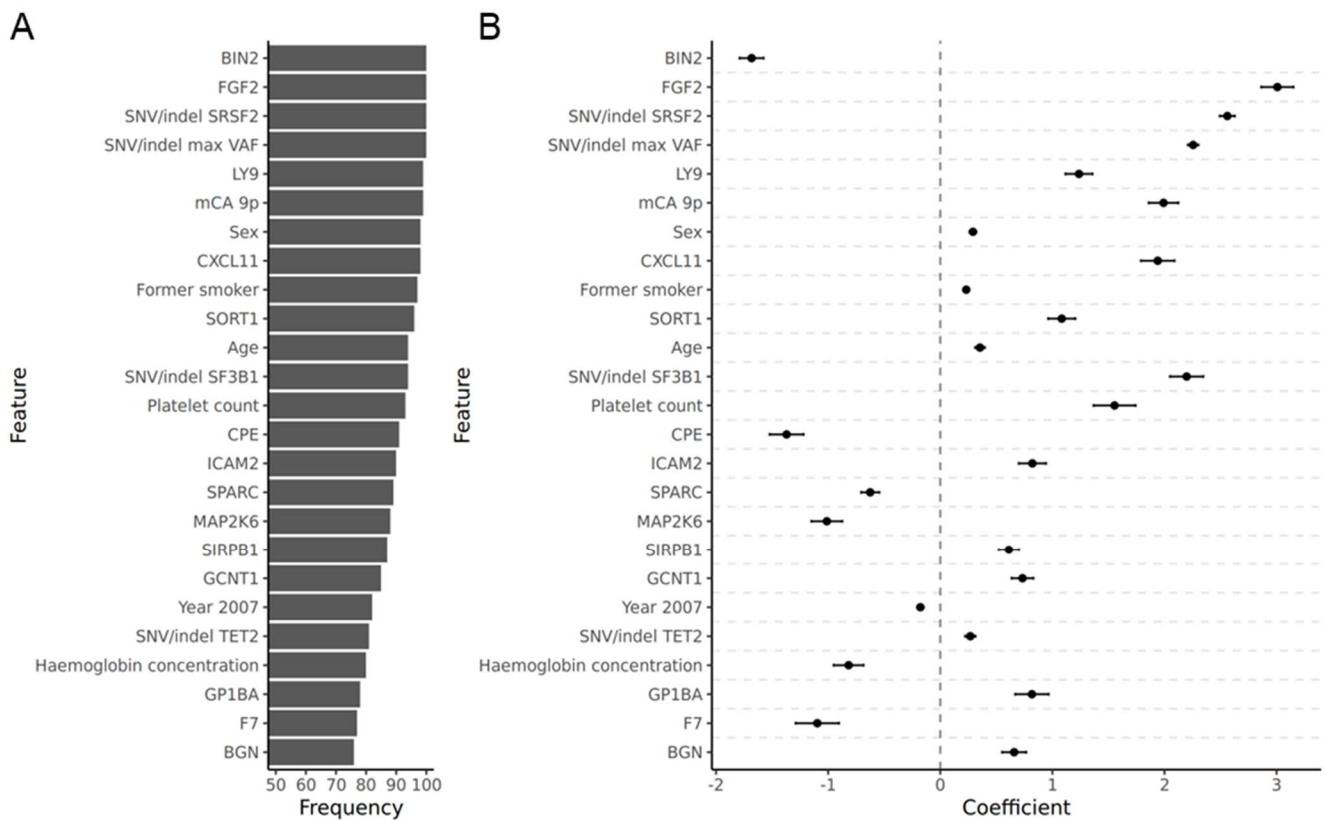

**Supplemental Figure 7. Prediction of MN risk using clinical, CH, and proteomics data.** (A) Bar chart of the most frequent features that predict MN risk in LASSO regression analysis ordered by the number of times they were included in the model during 100-fold cross validation. Features used in the analysis include demographics, blood counts, CH, and proteomics. (B) Forest plot illustrating the beta coefficients and their confidence intervals (95%) for the top 25 features from (A).
