# Supplementary material for: Plasma Proteomic Signature Predicts Myeloid Neoplasm Risk
Source: PubMed Central journal article supplement — Clin Cancer Res. 2024 Mar 6;30(15):3220–8. doi: 10.1158/1078-0432.CCR-23-3468 (PMC11292192; doi:10.1158/1078-0432.ccr-23-3468), 2024-03-06
Supplement: ccr-23-3468_supplementary_figure_s8_suppfs8.pdf [file ccr-23-3468_supplementary_figure_s8_suppfs8.pdf]

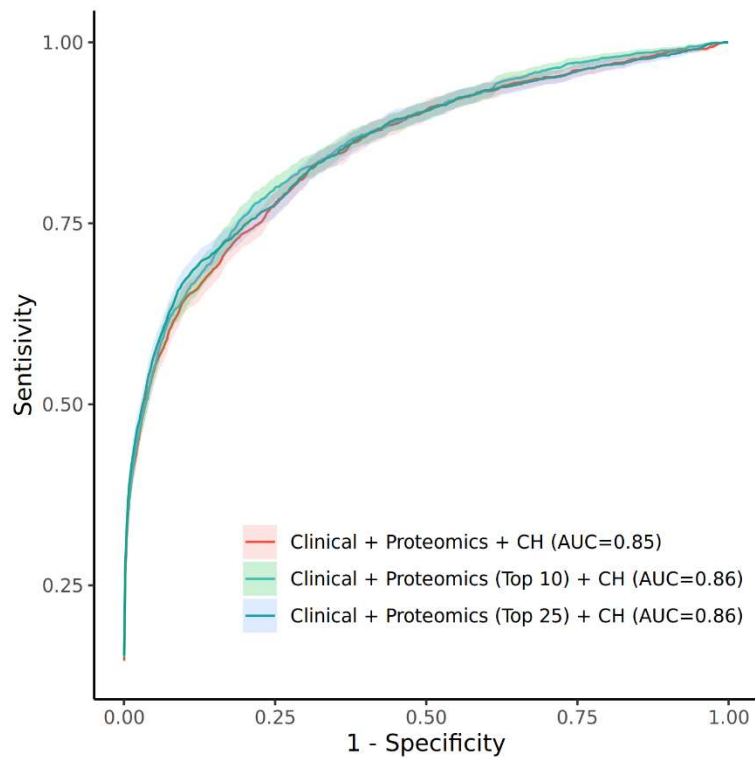

**Supplemental Figure 8. Discrimination of MN risk using reduced set of proteomics features.** Shown are the receiver operating (ROC) curves including the 95% confidence interval (lighter shading) for a MN risk model incorporating basic clinical features alongside CH and proteomics. The clinical model incorporates age, sex, ancestry, smoking status, blood counts, and sample age. Shown in red is a model incorporating all 115 proteins associated with MN risk. We compared this to models including a smaller number of proteomics features, specifically the top 10 (green) or blue (25) proteins calculated by frequency of inclusion across multiple iterations of the LASSO model.
