# Supplementary material for: Plasma Proteomic Signature Predicts Myeloid Neoplasm Risk
Source: PubMed Central journal article supplement — Clin Cancer Res. 2024 Mar 6;30(15):3220–8. doi: 10.1158/1078-0432.CCR-23-3468 (PMC11292192; doi:10.1158/1078-0432.ccr-23-3468), 2024-03-06
Supplement: ccr-23-3468_supplementary_figure_s9_suppfs9.pdf [file ccr-23-3468_supplementary_figure_s9_suppfs9.pdf]

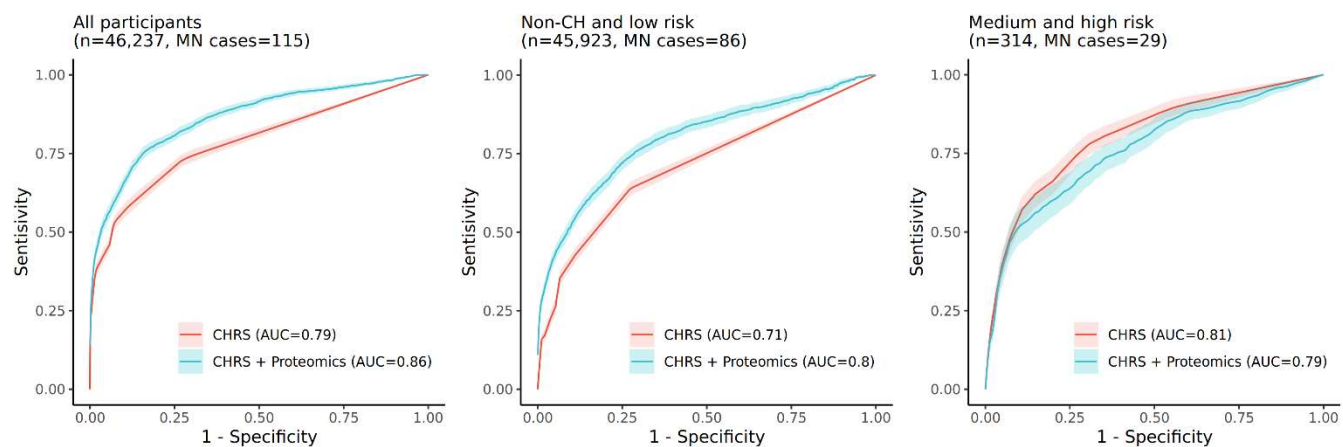

**Supplemental Figure 9. Discrimination of MN risk integrating Clonal Hematopoiesis Risk Score (CHRS) and proteomics.** The CHRS model developed by Weeks et al. incorporates age, red blood cell indices, cytopenias, and CH mutation characteristics (single DNMT3A, high-risk mutations, multiple mutations, VAF). Discrimination of MN risk by CHRS without or with proteomics features (N = 115 MN risk protein) was performed using a cross validation approach. The analysis was conducted using all participants with proteomics data available (N = 46,237; left), only participants without CH or low risk CH (N = 45,923; middle), and only participants with medium or high risk CH (N = 314; right). The receiver operating (ROC) curves include the 95% confidence intervals (lighter shading).
